# Supplementary material for: Metabolic potential of uncultured bacteria and archaea associated with petroleum seepage in deep-sea sediments
Source: PubMed Central journal article supplement (PMC6472368; doi:10.1038/s41467-019-09747-0), 2019-04-18
Supplement: 41467_2019_9747_MOESM3_ESM.pdf [file 41467_2019_9747_MOESM3_ESM.pdf]

## Description of Additional Supplementary Files

File Name: Supplementary Data 1

Description: Relative abundance data for 16S rRNA gene amplicon sequencing and metagenome sequencing.

File Name: Supplementary Data 2

Description: Summary statistics for archaeal and bacterial MAGs.

File Name: Supplementary Data 3

Description: (1) GTDB-Tk classification of bins identified in this study as members of TA06; (2) Summary statistics of potential TA06 genomes based on NCBI and GTDB.

File Name: Supplementary Data 4

Description: Functional analysis of archaeal and bacterial MAGs. Presence/absence of genes are listed as: Presence: >1 (red), Absence: 0 (no color).

File Name: Supplementary Data 5

Description: Accession numbers for genes involved in anaerobic hydrocarbon degradation used as custom database.
